# Supplementary material for: Single cell, super-resolution imaging reveals an acid pH-dependent conformational switch in SsrB regulates SPI-2
Source: eLife. 2019 Apr 29;8:e45311. doi: 10.7554/eLife.45311 (PMC6557628; doi:10.7554/eLife.45311)
Supplement: Figure 2—source data 1. [file elife-45311-fig2-data1.xlsx]

## Sheet: Sheet1
SsrB pH 5.6	SsrB pH 7.2	SsrA pH 5.6	SsrA pH 7.2
98.5028	21.6322	36.4712	24.5667
83.7521	12.67	56.356	16.9607
130.379	12.2487	48.0686	22.0097
58.0733	10.439	52.718	15.1046
73.5895	22.1692	48.4352	35.6755
28.4505	13.449	51.6048	8.27288
132.668	12.6454	55.6674	17.116
58.9918	7.21217	24.8009	28.0599
43.4405	10.2022	23.6017	9.38904
27.7613	15.0644	39.3008	11.3344
81.0102	14.1949	44.1966	11.8064
121.72	13.0719	35.4277	7.37003
73.8999	18.2911	39.2228	24.4373
127.458	17.753	34.1363	9.36183
112.614	21.0477	30.0827	23.3665
53.9559	12.0383	21.9834	13.146
66.2252	25.8167	62.2687	11.1732
96.471	16.9137	31.3681	29.3823
30.1829	27.9553	40.1683	19.9962
50.1992	13.9869	40.6009	5.43072
62.0952	11.7696	44.3188	10.6238
105.904	46.2744	39.6016	42.6773
46.4957	23.8517	36.7575	10.5527
71.7894	25.8756	38.2763	6.07072
62.2271	83.3252	33.6373	12.2878
81.3296	21.2268	35.7313	15.7646
95.3509	31.7633	21.7606	11.4396
138.56	14.6507	31.7976	37.0766
87.905	24.2223	44.1545	7.62453
70.1851	21.9405	43.9402	29.8582
38.772	21.3097	41.599	6.68505
118.007	24.8733	62.7418	11.6909
69.1418	20.7662	31.8706	6.97593
58.9788	33.0564	34.5746	9.95449
71.9834	23.7663	17.8114	19.2083
42.6861	39.1756	70.7978	10.9642
31.1639	34.9854	25.8655	14.0647
73.5212	14.6187	45.9121	5.62611
106.569	32.9971	28.6619	27.9969
81.8935	38.7873	24.234	8.22
86.8472	27.7778	35.8314	12.7832
87.0131	28.2416	17.9589	16.9547
38.1508	32.0479	24.3986	19.0682
70.0463	30.2572	22.0913	18.5146
93.6044	24.3326	46.3125	16.6561
53.9395	29.0171	33.6001	27.5368
50.7212	22.818	36.3274	11.2375
86.6979	39.721	27.5314	19.8001
73.3866	42.0555	51.0572	20.9404
39.6403	30.6845	60.2485	10.8315
57.165	20.5832	71.0408	9.18854
53.2939	28.5943	41.6967	7.51662
93.5856	21.4784	40.4918	17.6012
122.898	69.7518	17.4393	9.22266
88.3592	42.0552	39.5405	8.60004
20.6242	42.6606	28.9114	17.5843
66.7318	22.6972	39.6075	17.0839
63.112	28.3688	27.8278	15.5259
66.1859	34.6048	46.9043	22.7479
34.2863	47.8273	96.0294	11.1097
69.6586	74.7831	43.2673	9.72181
76.5957	41.6181	27.0666	13.5532
53.1821	22.4719	37.3508	12.951
55.2942	29.4291	55.3176	23.9477
37.6026	38.4098	45.0451	16.1867
55.907	32.5531	87.3753	17.1668
83.1389	34.6338	55.7703	16.3684
171.125	35.0514	67.6711	27.3838
189.321	22.8807	69.7076	9.08383
83.0309	16.2542	47.7543	5.68384
59.5979	28.8251	49.4165	10.7546
134.463	37.5839	52.687	32.4763
128.941	33.8319	76.1633	56.2254
61.0436	39.6205	63.8978	21.0379
88.5119	35.7672	58.3237	14.5404
68.6608	18.2274	63.63	9.23219
78.0217	42.959	80.9809	10.201
91.2497	62.1659	67.0744	10.0617
104.684	26.0335	47.0042	3.50846
59.3013	14.9637	57.1357	23.0873
62.5301	35.8295	68.3434	14.2713
116.596	39.4709	64.5544	25.4231
73.4819	31.2905	60.2858	19.8413
50.721	25.1541	48.5466	21.4633
69.7912	27.881	61.8389	20.949
135.626	21.8818	70.4824	22.77
134.201	26.9928	57.7075	9.38615
60.6566	22.7745	44.5898	31.1973
88.2404	19.9127	52.3025	18.4324
120	15.7791	82.732	17.248
165.634	26.8183	58.3073	23.3732
130.193	18.0614	59.1139	9.90812
144.959		60.2594	12.7175
57.3049		69.5218	16.7494
161.089		86.2025	20.6965
26.2329		63.1679	13.6602
94.1596		52.3797	18.5604
57.1195		71.4685	19.0779
62.1874		58.5371	12.5125
61.9933		62.583	14.7295
78.7867		68.4172	8.80116
123.521		77.033	9.11854
88.9454		71.3633	18.6387
41.5979		40.5398	17.5623
84.0183		58.7794	14.2267
106.562		70.8637	7.93581
49.8268		37.0441	14.2755
97.7696		60.4617	20.0837
122.221		47.9707	10.2328
205.695		43.3921	20.6833
59.5407		60.6439	24.2066
158.055		40.499	5.84169
128.722		65.8567	19.013
200.812		69.5507	14.4782
122.883		60.4926	7.03125
91.4954		61.8977	26.2221
57.3511		60.194	20.5565
105.947			21.7155
95.9431			17.2362
52.3457			16.7703
			10.0705
			18.3813
			9.97589
			14.202
			9.83061
