# Supplementary material for: Single cell, super-resolution imaging reveals an acid pH-dependent conformational switch in SsrB regulates SPI-2
Source: eLife. 2019 Apr 29;8:e45311. doi: 10.7554/eLife.45311 (PMC6557628; doi:10.7554/eLife.45311)
Supplement: Figure 2—source data 2. [file elife-45311-fig2-data2.xlsx]

## Sheet: Sheet1
	pH 7.2			pH 5.6
	Exp 1	Exp 2	Exp 3	Exp 1	Exp 2	Exp 3
ssrA-10-PAmCherry	20142.2	20080.9	22659	76996.4	71496.9	62613.1
ssrA::tet	2069.98	2567.91	2012.38	2745.59	3558.41	2331.04
wild-type	2992.38	3023.61	3638.95	14965.7	17853.7	16796.2
	"Exp" refers to independent experiments
