# Supplementary material for: Single cell, super-resolution imaging reveals an acid pH-dependent conformational switch in SsrB regulates SPI-2
Source: eLife. 2019 Apr 29;8:e45311. doi: 10.7554/eLife.45311 (PMC6557628; doi:10.7554/eLife.45311)
Supplement: Figure 4—figure supplement 2—source data 1. [file elife-45311-fig4-figsupp2-data1.xlsx]

## Sheet: Sheet8
t-Test: Two-Sample Assuming Unequal Variances
	Variable 1	Variable 2
Mean	48.7905	51.7805
Variance	489.692	1315.53
Observations	100	187
Hypothesized Mean Difference	0
df	280
t Stat	-0.865598
P(T<=t) one-tail	0.193726
t Critical one-tail	1.65031
P(T<=t) two-tail	0.387452
t Critical two-tail	1.96847

## Sheet: Sheet9
t-Test: Two-Sample Assuming Unequal Variances
	Variable 1	Variable 2
Mean	72.9666	19.8285
Variance	470.599	119.901
Observations	143	108
Hypothesized Mean Difference	0
df	221
t Stat	25.3294
P(T<=t) one-tail	1.38459e-67
t Critical one-tail	1.65178
P(T<=t) two-tail	2.76918e-67
t Critical two-tail	1.97076

## Sheet: Sheet10
t-Test: Two-Sample Assuming Unequal Variances
	Variable 1	Variable 2
Mean	72.9666	51.7805
Variance	470.599	1315.53
Observations	143	187
Hypothesized Mean Difference	0
df	311
t Stat	6.59308
P(T<=t) one-tail	9.23301e-11
t Critical one-tail	1.64977
P(T<=t) two-tail	1.8466e-10
t Critical two-tail	1.96762

## Sheet: Sheet11
t-Test: Two-Sample Assuming Unequal Variances
	Variable 1	Variable 2
Mean	48.7905	51.7805
Variance	489.692	1315.53
Observations	100	187
Hypothesized Mean Difference	0
df	280
t Stat	-0.865598
P(T<=t) one-tail	0.193726
t Critical one-tail	1.65031
P(T<=t) two-tail	0.387452
t Critical two-tail	1.96847

## Sheet: Sheet1
								two-tailed t-test (unpaired, unequal variances)
	p-ompR 7.4	p-ompR 5.6	p-phoP 7.4	p-phoP5.6							P value
	48.5437	85.2566	33.7065	38.2618				p-ompR 7.4 vs p-ompR 5.6			4.88474e-15
	70.1675	47.0828	29.9199	29.1502				p-phoP 7.4 vs p-phoP5.6			1.14488e-23
	81.3382	45.5481	27.2599	57.6437
	40.5219	82.7217	7.44667	18.0818
	64.3141	93.1315	23.6734	32.6006
	50.7415	94.5312	62.2329	50.9435
	58.4814	54.95	24.8901	21.9034
	50.8906	49.6801	5.74508	39.806
	59.23	92.1986	22.9108	27.5198
	56.9782	106.447	26.4269	70.3171
	36.8093	67.1814	19.2313	61.8777
	77.0748	62.0963	24.397	7.33437
	84.5547	106.647	54.7594	27.0333
	72.2751	66.5821	10.3351	49.4697
	40.489	76.33	13.6976	75.2328
	91.6736	97.8138	12.6283	25.9671
	41.2466	52.7273	13.1929	48.1524
	48.2163	93.3372	9.48857	8.29846
	36.74	98.0794	51.3724	13.379
	41.0066	97.9458	18.1	51.3669
	27.0498	109.82	14.9684	45.6838
	61.0573	68.2288	11.6186	11.6192
	58.6732	96.4542	13.1637	15.2888
	30.9598	78.2918	15.0796	19.9494
	117.133	115.537	26.6491	53.8013
	22.0067	74.0557	39.7343	73.9896
	39.3265	81.859	33.5808	10.3261
	36.3817	68.8827	23.7502	111.533
	78.7603	62.7209	17.3461	20.2508
	102.808	80.6984	28.5271	18.5938
	49.1603	74.8644	7.33636	45.0361
	34.4552	86.6546	5.96619	54.7958
	50.8072	99.6678	9.27367	103.983
	27.6095	106.992	8.85652	90.6436
	58.2463	70.3959	41.1488	52.5225
	40.7267	57.7668	10.3972	62.0492
	40.1403	100.048	12.3495	28.4104
	23.174	96.1354	24.3332	105.955
	57.9341	68.7451	26.8438	12.0617
	66.5906	95.9706	16.9851	34.3306
	58.5957	88.4011	35.4312	110.266
	27.9238	69.0072	45.5152	44.1805
	126.524	47.8573	44.0562	17.9574
	30.461	45.8015	41.4124	50.9075
	37.824	53.3158	32.4125	6.41653
	86.7151	57.294	28.5392	75.4518
	93.5295	97.0621	29.398	22.1811
	42.4472	124.297	28.374	38.5895
	43.5499	54.0115	46.3578	30.226
	43.2684	92.3396	25.536	19.9681
	56.2094	58.6405	12.5813	60.1141
	64.5738	81.7732	23.5582	21.8959
	29.5016	94.7663	29.7524	16.4702
	64.3386	49.0196	18.1174	34.4714
	45.312	49.5988	12.8779	34.7665
	40.3541	65.9519	20.4712	36.6569
	60.7372	82.6596	11.0854	50.1898
	43.5454	74.5277	16.4634	12.7679
	50.9333	52.737	16.4634	20.8615
	53.6159	123.043	13.4122	16.405
	42.5856	18.4856	23.4292	9.63012
	23.6117	51.8533	20.2445	66.8937
	22.9027	86.6977	17.9512	66.8624
	49.3959	80.4205	14.5345	45.1347
	46.6651	75.2772	9.19188	92.111
	39.8172	68.9264	17.2265	25.2921
	25.1539	58.5492	17.7109	21.0336
	38.0618	51.7897	13.9901	10.6135
	90.0627	38.5526	11.4826	51.2992
	30.0829	46.2084	19.7355	64.8427
	54.8503	109.667	23.7545	30.379
	22.3063	63.3373	29.0179	24.42
	36.3326	75.8323	17.4566	60.6807
	33.5242	57.8434	11.3296	85.7515
	23.4897	70.118	15.1292	121.94
	21.6258	89.6257	16.3295	74.8892
	28.2778	49.1803	9.61388	72.9862
	31.5653	50.3368	9.18186	81.5661
	25.1969	34.147	13.5047	53.441
	29.1318	50.3368	14.5035	53.3391
	31.0213	47.3423	14.9972	59.081
	43.3141	36.3351	15.8462	62.3367
	49.2039	63.4369	9.24676	57.2418
	21.4424	51.5897	13.1741	109.959
	90.2774	78.2455	11.648	51.8676
	25.6064	39.7461	12.0569	16.7469
	10.5489	34.0313	21.8627	43.1296
	37.9176	41.2733	11.8802	13.7348
	38.1155	61.3497	11.8194	12.8933
	28.3683	101.423	9.78126	41.5967
	35.1835	58.8859	8.80976	46.9039
	46.1884	80.1115	8.79657	45.7531
	43.7163	62.2293	9.05499	22.4225
	43.8356	89.3575	18.0573	14.5626
	35.7562	124.302	9.5943	45.2873
	74.1218	60.9183	15.9764	21.669
	58.4762	53.2562	15.7565	20.8067
	44.1575	39.041	15.6099	11.7443
	95.2169	90.1227	17.9087	46.3517
	37.6858	51.3414	15.873	31.0729
		62.8424	14.2248	25.6378
		69.1134	18.319	30.5293
		97.1082	18.534	32.2791
		98.4335	13.8658	45.3122
		87.0028	27.6062	46.8025
		67.562	13.0676	17.8335
		65.9876	14.4989	20.0022
		80.4593	17.1513	23.511
		54.1603		40.2047
		51.7531		23.7417
		84.1372		27.7621
		113.487		24.4113
		71.7978		29.3234
		68.6465		27.639
		63.3931		28.5755
		50.7054		25.1476
		78.2428		51.0856
		82.3166		50.2265
		66.9		44.3734
		86.4616		11.2994
		70.4527		7.36547
		59.2305		11.6803
		70.4489		17.3441
		85.2982		33.2721
		51.7555		28.665
		54.2644		22.819
		114.372		10.7181
		94.3588		67.3751
		79.8574		84.1149
		75.8809		93.1099
		18.5075		77.4344
		90.3919		75.3603
		106.803		40.3294
		73.6638		52.1884
		81.9371		63.5349
		93.2625		34.8259
		64.9409		78.9096
		65.238		53.1832
		62.1313		150.095
		83.4586		102.537
		53.0421		56.4209
		83.5782		33.066
		83.129		110.228
				71.763
				88.6525
				53.3611
				91.1242
				115.874
				67.3499
				113.907
				59.775
				91.5141
				99.9474
				73.1338
				16.7803
				39.0611
				65.5066
				170.957
				78.9434
				39.3555
				109.812
				105.28
				84.3237
				119.536
				90.1921
				174.692
				89.9724
				204.617
				207.797
				48.3764
				68.8616
				96.217
				127
				66.2134
				36.6682
				52.2994
				33.6971
				31.8005
				50.3525
				26.7546
				30.6748
				27.499
				18.0391
				19.0632
				68.9877
				52.6423
				40.122
