# Supplementary material for: Single cell, super-resolution imaging reveals an acid pH-dependent conformational switch in SsrB regulates SPI-2
Source: eLife. 2019 Apr 29;8:e45311. doi: 10.7554/eLife.45311 (PMC6557628; doi:10.7554/eLife.45311)
Supplement: Figure 4—figure supplement 3—source data 1. [file elife-45311-fig4-figsupp3-data1.xlsx]

## Sheet: Counting
PhoP-PAmCherry pH 5.6	PhoP-PAmCherry pH 7.2		OmpR-PAmCherry pH 5.6	OmpR-PAmCherry pH 7.2
152.788	88.5827		153.871	88.6184
168.591	109.229		132.225	121.525
142.16	56.8977		93.0654	211.361
222.023	92.3706		132.238	143.435
178.01	91.1307		191.412	129.552
209.148	95.3188		85.1551	142.139
293.04	105.512		220.461	140.909
200.143	122.427		141.849	128.214
149.061	135.275		80.452	211.588
158.671	113.677		143.049	255.187
207.67	129.199		131.15	122.084
138.094	57.1091		212.486	128.984
146.468	88.6563		162.659	181.713
123.832	53.0804		228.351	113.925
141.396	46.0776		224.425	153.51
204.701	99.3281		133.161	116.98
138.752	65.1792		138.237	129.921
200.883	107.949		144.254	98.3554
174.099	79.3339		207.26	132.785
123.875	118.278		213.177	140.361
190.759	117.744		361.163	143.106
106.131	204.67		210.661	95.498
72.0115	69.6192		201.377	156.892
256.26	122.233		104.983	139.594
114.729	39.6462		132.705	102.917
147.442	37.5316		155.471	130.734
193.083	118.362		189.878	136.993
120.206	50.2197		257.755	136.028
121.709	79.9938		155.709	100.658
165.769	61.5183		162.08	108.718
193.144	266.501		150.357	91.0826
194.749	105.41		163.285	135.022
158.641	156.981		121.961	163.431
222.282	154.141		123.494	108.807
256.41	80.8522		184.296	188.467
88.6632	89.9887		129.537	87.9297
90.2818	92.1105		242.027	177.882
140.139	76.4818		154.673	98.3026
167.172	110.335		224.738	171.894
168.18	155.211		158.301	110.268
137.499	60.7827		268.986	126.19
162.602	75.1468		210.845	161.74
295.117	93.2788		222.681	196.909
127.692	67.7384		269.053	162.353
145.665	127.7		208.333	182.208
159.314	144.231		206.764	165.289
272.893	99.653		116.681	110.178
144.992	109.455		245.817	182.504
221.01	47.0996		167.896	129.17
144.47	115.292		140.938	102.432
111.072	83.0272		179.287	147.502
208.451	80.8123		164.669	107.679
170.915	37.1458		149.135	197.977
225.74	81.4138		203.156	226.683
271.02	38.6466		171.778	152.982
240.53	141.625		171.852	96.6755
131.171	66.7429		144.322	243.84
262.087	112.99		173.887	235.763
237.108	49.2449		148.032	152.867
188.992	151.708		222.266	209.511
246.333	74.3403		214.634	150.568
267.732	94.2575		216.29	161.26
293.274	61.1227		187.746	163.695
187.541	71.2946		219.82	234.738
145.624	45.7263		141.317	157.048
272.495	96.7175		223.787	180.536
133.147	56.4723		202.635	157.527
266.295	79.5214		223.518	182.558
241.451	113.069		252.513	307.358
150.148	64.9756		258.567	141.714
132.186	67.4193		214.614	146.348
140.005	88.8841		173.1	108.07
323.315	66.8498		226.042	140.207
169.453	79.2031		171.821	193.076
57.8781	74.9306		259.331	198.383
219.875	85.4236
217.347	79.9177
122.965	47.4346
174.431	120.751
285.052	139.467
74.1647	132.439
119.765	93.9315
292.524	80.1899
104.615	152.894
98.832	149.148
92.4354	130.297
194.492	134.986
331.492	144.699
250.87	133.36
312.547	65.5821
107.61	61.5006
288.149	66.7037
108.371	213.312
158.69	100.372
116.289	80.4373
208.119	97.4026
228.256	94.6997
132.123	101.679
314.547	76.1273
60.3063	161.589
212.5	58.7829
139.628	170.213
247.213	116.515
238.339	67.0963
187.01	122.703
183.141	62.0696
277.55	189.919
330.531	116.897
334.374	133.045
156.549	94.267
153.89	186.754
203.741	101.639
204.215	149.049
298.987	155.162
313.489	107.704
269.716	111.955
166.929	115.298
152.644	71.8292
238.775	89.8778
257.765	115.615
135.857	204.765
170.729	79.2323
	133.4
	134.74
	48.3668
	86.966
	112.857
	65.4239
	78.8721
	80.0078
	52.5502
	105.595
	85.9423
	81.5649
	48.5232
	58.7132
	94.5906
	131.954
	126.801
	79.0598

## Sheet: SPT
PhoP, pH7.2
	Cells	Tracks	Fitted Parameters
	103	2930	F1 = 0.106 (0.1005, 0.1115)
			F2 = 0.1875 (0.1723, 0.2028)
			F3 = 0.706 (0.6877, 0.7242)
			D1 = 0.04278 (0.04016, 0.0454)
			D2 = 0.3981 (0.3555, 0.4407)
			D3 = 1.579 (1.552, 1.607)
				95% Conf					95% Conf
F1	0.106	0.1005	0.1115	0.0055	D1	0.04278	0.04016	0.0454	0.00262
F2	0.1875	0.1723	0.2028	0.01525	D2	0.3981	0.3555	0.4407	0.0426
F3	0.706	0.6877	0.7242	0.01825	D3	1.579	1.552	1.607	0.0275
PhoP, pH5.6
	Cells	Tracks	Fitted Parameters
	81	3665	F1 = 0.09808 (0.08348, 0.1127)
			F2 = 0.2372 (0.2244, 0.2499)
			F3 = 0.664 (0.6602, 0.6677)
			D1 = 0.03308 (0.02951, 0.03665)
			D2 = 0.1353 (0.1264, 0.1442)
			D3 = 1.54 (1.529, 1.551)
				95% Conf		Ave			95% Conf
F1	0.09808	0.08348	0.1127	0.01461	D1	0.03308	0.02951	0.03665	0.00357
F2	0.2372	0.2244	0.2499	0.01275	D2	0.1353	0.1264	0.1442	0.0089
F3	0.664	0.6602	0.6677	0.00375	D3	1.54	1.529	1.551	0.011
OmpR, pH7.2
	Cells	Tracks	Fitted Parameters
	55	2119	F1 = 0.1636 (0.1532, 0.1741)
			F2 = 0.2801 (0.2715, 0.2886)
			F3 = 0.5557 (0.5453, 0.566)
			D1 = 0.04454 (0.04201, 0.04706)
			D2 = 0.2539 (0.2361, 0.2717)
			D3 = 1.449 (1.426, 1.473)
				95% Conf		Ave			95% Conf
F1	0.1636	0.1532	0.1741	0.01045	D1	0.04454	0.04201	0.04706	0.002525
F2	0.2801	0.2715	0.2886	0.00855	D2	0.2539	0.2361	0.2717	0.0178
F3	0.5557	0.5453	0.566	0.01035	D3	1.449	1.426	1.473	0.0235
OmpR, pH5.6			Fitted Parameters
	Cells	Tracks	F1 = 0.2194 (0.2057, 0.2332)
	43	1610	F2 = 0.2087 (0.1984, 0.2191)
			F3 = 0.5703 (0.5575, 0.5832)
			D1 = 0.05406 (0.05143, 0.05668)
			D2 = 0.2642 (0.2344, 0.2939)
			D3 = 1.339 (1.315, 1.362)
				95% Conf		Ave			95% Conf
F1	0.2194	0.2057	0.2332	0.01375	D1	0.05406	0.05143	0.05668	0.002625
F2	0.2087	0.1984	0.2191	0.01035	D2	0.2642	0.2344	0.2939	0.02975
F3	0.5703	0.5575	0.5832	0.01285	D3	1.339	1.315	1.362	0.0235
