# Supplementary material for: Single cell, super-resolution imaging reveals an acid pH-dependent conformational switch in SsrB regulates SPI-2
Source: eLife. 2019 Apr 29;8:e45311. doi: 10.7554/eLife.45311 (PMC6557628; doi:10.7554/eLife.45311)
Supplement: Figure 4—source data 1. [file elife-45311-fig4-data1.xlsx]

## Sheet: Sheet1
wild-type pH 5.6	wild-type pH 7.2	phoP::kan pH 5.6	phoP::kan pH 7.2	ompR::kan pH 5.6	ompR::kan pH 7.2
98.5028	21.6322	8.94085	16.3864	56.0666	26.4174
83.7521	12.67	15.0966	6.89497	27.9535	22.8424
130.379	12.2487	14.9583	13.6545	34.638	16.5254
58.0733	10.439	17.6198	25.591	23.8405	17.6154
73.5895	22.1692	12.8411	17.4656	34.2754	24.1473
28.4505	13.449	16.4537	17.995	36.437	46.3097
132.668	12.6454	11.1155	18.3773	20.4809	30.5778
58.9918	7.21217	15.5958	21.6567	63.9842	31.4122
43.4405	10.2022	17.8342	17.9977	95.833	28.7305
27.7613	15.0644	9.38715	20.9873	29.2897	43.1174
81.0102	14.1949	13.0483	17.1809	44.2131	20.0341
121.72	13.0719	8.49347	15.4372	53.8994	21.4865
73.8999	18.2911	12.6596	14.7856	46.682	13.4631
127.458	17.753	21.9158	17.4648	58.2451	20.7004
112.614	21.0477	11.8757	13.0634	20.888	20.2456
53.9559	12.0383	17.3258	18.4087	34.6225	27.2672
66.2252	25.8167	10.9283	13.4367	104.739	28.6136
96.471	16.9137	13.6781	13.6324	34.3341	19.5426
30.1829	27.9553	14.8478	15.5335	73.1358	20.5736
50.1992	13.9869	27.3224	23.4501	44.6183	22.3075
62.0952	11.7696	28.86	15.3792	56.7312	21.9405
105.904	46.2744	14.8743	21.0659	24.9256	32.2451
46.4957	23.8517	21.7077	44.057	31.8957	21.3083
71.7894	25.8756	8.59722	11.5522	38.5505	17.1491
62.2271	83.3252	11.9868	33.449	55.1557	24.3744
81.3296	21.2268	13.2005	17.1262	39.5038	22.2983
95.3509	31.7633	29.408	17.8302	56.6633	24.7601
138.56	14.6507	26.6253	15.6438	39.0764	21.77
87.905	24.2223	16.8675	18.9776	34.3869	18.322
70.1851	21.9405	13.7185	15.8295	35.2662	14.9156
38.772	21.3097	13.7313	24.4449	52.3459	14.5508
118.007	24.8733	20.7792	17.8103	37.5219	37.9624
69.1418	20.7662	9.47064	23.3811	20.9814	37.9687
58.9788	33.0564	13.2562	12.6569	85.9322	10.5541
71.9834	23.7663	14.0858	26.0138	33.4056	19.5058
42.6861	39.1756	11.0671	12.8238	49.4975	10.9298
31.1639	34.9854	23.6381	20.8671	29.4867	9.32568
73.5212	14.6187	26.0357	10.9613	25.8995	12.7847
106.569	32.9971	8.95175	37.2224	44.2016	21.5472
81.8935	38.7873	11.6959	10.1203	25.0298	22.0593
86.8472	27.7778	8.09935	30.7692	48.9633	23.7977
87.0131	28.2416	8.86869	20.1613	28.6259	15.234
38.1508	32.0479	11.2152	26.9005	27.6402	11.4574
70.0463	30.2572	16.3132	15.0436	33.7282	23.9087
93.6044	24.3326	17.6554	28.4176	96.7525	23.2423
53.9395	29.0171	13.7114	28.2845	83.1805	16.7768
50.7212	22.818	16.7723	22.6938	52.2762	20.6534
86.6979	39.721	9.3289	24.6305	28.3019	44.5783
73.3866	42.0555	10.5652	11.5351	39.7198	24.5125
39.6403	30.6845	19.4158	22.0783	32.0298	25.4638
57.165	20.5832	18.4373	17.4571	29.6044	29.2665
53.2939	28.5943	12.9861	13.2371	39.9429	28.9645
93.5856	21.4784	16.4681	19.1138	34.3776	33.3232
122.898	69.7518	7.19367	19.5755	42.1743	21.9161
88.3592	42.0552	9.91156	18.9206	24.419	23.2693
20.6242	42.6606	12.8002	28.1385	23.142	22.2253
66.7318	22.6972	12.874	25.7491	46.9911	25.9146
63.112	28.3688	10.5915	25.7437	56.243	19.829
66.1859	34.6048	16.4345	18.5675	51.4594	20.4221
34.2863	47.8273	18.8162	18.5064	31.7648	24.5052
69.6586	74.7831	10.4314	13.0776	29.5725	45.7178
76.5957	41.6181	15.7705	17.759	80.1691	37.8284
53.1821	22.4719	15.2569	35.5691	33.8409	27.1163
55.2942	29.4291	10.5911	12.215	27.3873	28.3194
37.6026	38.4098	16.5897	16.3702	39.5287	46.62
55.907	32.5531	10.9469	18.2927	35.2537	23.8819
83.1389	34.6338	13.7831	16.6752	51.8047	51.5316
171.125	35.0514	14.506	15.3444	28.1889	25.1358
189.321	22.8807	21.6829	44.5576	82.8089	30.4788
83.0309	16.2542	17.518	18.1571	72.6771	46.5271
59.5979	28.8251	12.914	8.17461	45.9892	27.86
134.463	37.5839	8.8574	16.094	55.8379	32.7818
128.941	33.8319	8.01826	11.5407	58.8861	27.5989
61.0436	39.6205	14.51	14.2402	23.0999	21.6847
88.5119	35.7672	12.1406	23.9096	36.369	20.9842
68.6608	18.2274	10.6298	14.711	17.7641	7.25755
78.0217	42.959	19.1775	18.9197	40.3323	17.0961
91.2497	62.1659	14.8112	16.5837	38.0292	25.8732
104.684	26.0335	18.5008	22.8933	58.794	14.8588
59.3013	14.9637	16.1747	20.7792	34.9287	16.0913
62.5301	35.8295	20.0746	24.5618	37.155	32.8827
116.596	39.4709	10.2177	15.3905	24.9066	18.1125
73.4819	31.2905	43.4475	17.0384	81.5328	26.4296
50.721	25.1541	16.4721	26.2824	38.5414	17.378
69.7912	27.881	24.4121	13.5187	26.7107	27.1637
135.626	21.8818	36.6947	20.6362	27.7846	34.8558
134.201	26.9928	20.0933	26.5803	14.4641	27.482
60.6566	22.7745	21.2696	12.3381	24.3436	21.7059
88.2404	19.9127	15.8326	13.2705	26.9604	27.3251
120	15.7791	8.69403	10.876	35.0198	28.7474
165.634	26.8183	12.2604	14.5366	26.4725	13.9852
130.193	18.0614	20.1248	12.0099	34.9028	28.5157
144.959		19.1062	14.0541	22.8426	23.2787
57.3049		3.31702	13.8345	38.2494	17.6093
161.089		26.7108	23.1452	29.3215	24.8007
26.2329		14.1683	14.3499	70.893	34.293
94.1596		12.0368	13.9317	127.216	19.5281
57.1195		14.1452	14.7804	67.5311	38.4552
62.1874		12.1684	22.2287	53.1061	12.8708
61.9933		19.1113	26.5459	60.9756	26.3383
78.7867		21.6979	13.391	40.2479	33.9516
123.521		20.261	23.2515	41.4516	19.424
88.9454		27.5781	21.9916	47.4881	23.8664
41.5979		12.9823	21.2007	23.762	23.9633
84.0183		28.9017	28.3382	48.2736	35.68
106.562		10.0846	14.236	54.8838	29.9243
49.8268		15.6509	12.7902	93.0375	32.9141
97.7696		16.6376	11.6923	68.3042	27.8479
122.221		8.55066	14.7689	58.0029	24.5151
205.695		16.4812	20.1014	82.4899	17.8433
59.5407		15.6653	20.7814	23.8563	25.8557
158.055		12.4118	19.7941	51.4655	33.308
128.722		17.2232	21.9106	129.979	23.069
200.812		16.5975	20.9921	67.532	36.9686
122.883		11.0857	37.1182	69.4625	35.7263
91.4954		13.7533	7.71248	39.7125	14.0466
57.3511		11.1909	20.4135	37.5996	23.4407
105.947		9.30738	12.8535	45.9832
95.9431		12.6324	21.0817	107.171
52.3457		25.736	30.7974	46.1223
		19.9524	25.6926	48.6195
		12.1556	27.9978	95.9071
		22.003	34.4177	54.1981
		14.3597	30.3532	35.521
		10.7258	28.1124	53.5699
		14.6023	10.327	65.1427
		14.4092	16.9483	55.6628
		27.5132	30.8914	38.4197
		28.6691	18.6517	44.7249
		18.0761	22.5111	36.7741
		13.3259	16.473	45.3295
			6.80478
			13.5227
			18.3131
			17.7305
			36.0546
			12.4844
			18.994
			22.6531
			26.6362
