# Supplementary material for: Single cell, super-resolution imaging reveals an acid pH-dependent conformational switch in SsrB regulates SPI-2
Source: eLife. 2019 Apr 29;8:e45311. doi: 10.7554/eLife.45311 (PMC6557628; doi:10.7554/eLife.45311)
Supplement: Figure 4—source data 3. [file elife-45311-fig4-data3.xlsx]

## Sheet: Sheet1
PhoP-PAmCherry pH 5.6	PhoP-PAmCherry pH 7.2
152.788	88.5827
168.591	109.229
142.16	56.8977			statistics
222.023	92.3706			two-tailed t-test (unpaired, unequal variances)
178.01	91.1307
209.148	95.3188				P-value		Significant?
293.04	105.512			PhoP 5.6 vs PhoP 7.2	7.09965e-28		Y
200.143	122.427
149.061	135.275
158.671	113.677
207.67	129.199
138.094	57.1091
146.468	88.6563
123.832	53.0804
141.396	46.0776
204.701	99.3281
138.752	65.1792
200.883	107.949
174.099	79.3339
123.875	118.278
190.759	117.744
106.131	204.67
72.0115	69.6192
256.26	122.233
114.729	39.6462
147.442	37.5316
193.083	118.362
120.206	50.2197
121.709	79.9938
165.769	61.5183
193.144	266.501
194.749	105.41
158.641	156.981
222.282	154.141
256.41	80.8522
88.6632	89.9887
90.2818	92.1105
140.139	76.4818
167.172	110.335
168.18	155.211
137.499	60.7827
162.602	75.1468
295.117	93.2788
127.692	67.7384
145.665	127.7
159.314	144.231
272.893	99.653
144.992	109.455
221.01	47.0996
144.47	115.292
111.072	83.0272
208.451	80.8123
170.915	37.1458
225.74	81.4138
271.02	38.6466
240.53	141.625
131.171	66.7429
262.087	112.99
237.108	49.2449
188.992	151.708
246.333	74.3403
267.732	94.2575
293.274	61.1227
187.541	71.2946
145.624	45.7263
272.495	96.7175
133.147	56.4723
266.295	79.5214
241.451	113.069
150.148	64.9756
132.186	67.4193
140.005	88.8841
323.315	66.8498
169.453	79.2031
57.8781	74.9306
219.875	85.4236
217.347	79.9177
122.965	47.4346
174.431	120.751
285.052	139.467
74.1647	132.439
119.765	93.9315
292.524	80.1899
104.615	152.894
98.832	149.148
92.4354	130.297
194.492	134.986
331.492	144.699
250.87	133.36
312.547	65.5821
107.61	61.5006
288.149	66.7037
108.371	213.312
158.69	100.372
116.289	80.4373
208.119	97.4026
228.256	94.6997
132.123	101.679
314.547	76.1273
60.3063	161.589
212.5	58.7829
139.628	170.213
247.213	116.515
238.339	67.0963
187.01	122.703
183.141	62.0696
277.55	189.919
330.531	116.897
334.374	133.045
156.549	94.267
153.89	186.754
203.741	101.639
204.215	149.049
298.987	155.162
313.489	107.704
269.716	111.955
166.929	115.298
152.644	71.8292
238.775	89.8778
257.765	115.615
135.857	204.765
170.729	79.2323
	133.4
	134.74
	48.3668
	86.966
	112.857
	65.4239
	78.8721
	80.0078
	52.5502
	105.595
	85.9423
	81.5649
	48.5232
	58.7132
	94.5906
	131.954
	126.801
	79.0598
