# Supplementary material for: Single cell, super-resolution imaging reveals an acid pH-dependent conformational switch in SsrB regulates SPI-2
Source: eLife. 2019 Apr 29;8:e45311. doi: 10.7554/eLife.45311 (PMC6557628; doi:10.7554/eLife.45311)
Supplement: Figure 5—source data 1. [file elife-45311-fig5-data1.xlsx]

## Sheet: Sheet1
sseB plus	sseB minus
178.805	126.871
184.151	115.223
109.36	170.385
153.846	85.5255
108.209	113.579
96.393	100.705
92.6599	103.786
181.44	164.189
126.9	141.99
175.816	76.9689
201.296	212.246
114.282	157.163
86.3261	118.041
128.739	143.656
99.1326	158.293
135.821	101.312
68.6499	62.8393
64.9858	163.338
151.386	91.7782
120.206	164.685
148.026	63.6406
146.795	81.7403
116.71	200.284
247.466	32.0427
66.1838	84.1577
46.6737	132.004
77.9489	100.929
208.028	93.2061
94.6079	80.1059
101.486	125
147.719	81.3443
125.897	129.048
89.6897	128.125
122.043	172.028
64.5203	242.588
132.374	156.508
94.2675	124.36
89.1957	159.392
237.587	114.93
116.69	178.679
94.5469	189.312
295.869	128.546
71.1172	114.015
112.289	118.878
225.496	133.76
226.279	121.24
130.357	128.263
213.068	62.2437
267.034	106.974
142.071	106.32
68.0685	115.065
211.384	146.68
174.768	65.1447
45.8802	56.3552
82.5521	28.7847
127.44	99.1408
92.1986	78.7636
	205.354
	82.1303
	111.22
	80.1925
	122.986
	76.1001
	100.309
	169.996
	92.2064
	29.4222
	84.0948
	95.1769
	104.621
	75.5532
	116.724
	97.6604
	113.602
	78.4929
	115.84
	53.2978
	139.087
	110.009
	58.1594
	91.5722
	118.419
	69.7674
	92.9039
	173.558
	94.3666
	104.708
	49.6689
	137.077
	153.274
	79.3412
	111.435
	131.33
	78.7519
	117.779
	89.0879
	148.906
	119.828
	75.6171
	130.202
	44.9753
	73.6316
	125.383
	104.334
	127.639
	70.4444
	77.343
	67.7474
	231.699
	57.2028
	139.263
	101.415
	97.9499
	109.821
	161.268
	54.0482
	107.527
	153.744
	78.8802
	147.783
	148.656
	132.921
	100.046
	145.507
	236.272
	169.612
	97.8822
	79.7259
	95.3638
	65.4556
	63.8193
	68.6515
	89.9743
	70.0145
	116.046
	31.1818
	220.229
	107.007
	9.4115
	57.7163
	87.7796
	142.305
	170.121
	123.891
	70.4704
	80.0877
	151.055
	95.3653
	129.372
	142.334
	125.97
	108.561
	72.7439
	159.528
	231.984
	55.5556
	222.795
	92.287
	66.2024
	101.461
	110.943
	74.0741
	114.697
	153.9
	52.4006
	133.724
	103.061
	101.83
	123.313
	108.483
