# Supplementary material for: Single cell, super-resolution imaging reveals an acid pH-dependent conformational switch in SsrB regulates SPI-2
Source: eLife. 2019 Apr 29;8:e45311. doi: 10.7554/eLife.45311 (PMC6557628; doi:10.7554/eLife.45311)
Supplement: Figure 6—figure supplement 2—source data 1. [file elife-45311-fig6-figsupp2-data1.xlsx]

## Sheet: Nucleoid Size by SIM
pixelsize	0.06587	um
		SsrB_pH7.2				Nucleoid			SsrB_pH5.6				Nucleoid		Intensity ratio	Nucleoid area ratio
		Cell #	Pixel Intensity	#pixels	Intensity	Area (um^2)			Cell #	Pixel Intensity	#pixels	Intensity	Area (um^2)
		161			80553.5	0.617357	Mean		182			66410.4	0.498253	Mean	0.824427	0.807074
					25446.4	0.147087	Std					20727.1	0.222541	Std
		1	54825	215	83391	0.932854			1	23205	91	42425	0.394836
		2	28815	113	38865	0.490291			2	28305	111	64096	0.481613
		3	44370	174	73920	0.754961			3	21420	84	51514	0.364464
		4	51510	202	82459	0.876449			4	29325	115	53424	0.498969
		5	46920	184	90981	0.79835			5	36210	142	64884	0.616118
		6	50235	197	85765	0.854755			6	18615	73	47449	0.316737
		7	53805	211	111416	0.915499			7	14025	55	40934	0.238637
		8	33915	133	77224	0.577068			8	26010	102	71317	0.442563
		9	35700	140	92518	0.60744			9	20910	82	46919	0.355786
		10	59925	235	94576	1.01963			10	34170	134	63957	0.581407
		11	31620	124	76228	0.538018			11	41820	164	48403	0.711573
		12	26010	102	59361	0.442563			12	34425	135	48490	0.585746
		13	46920	184	91581	0.79835			13	46665	183	69657	0.794011
		14	29325	115	74984	0.498969			14	11475	45	46676	0.195249
		15	40290	158	50462	0.685539			15	35955	141	50663	0.611779
		16	35190	138	95598	0.598762			16	27285	107	68780	0.464258
		17	38505	151	102459	0.655167			17	31875	125	55656	0.542357
		18	26775	105	59351	0.45558			18	24990	98	63302	0.425208
		19	38505	151	62428	0.655167			19	20910	82	46252	0.355786
		20	38505	151	62817	0.655167			20	38505	151	68750	0.655167
		21	45390	178	87171	0.772317			21	26265	103	37590	0.446902
		22	49215	193	105412	0.837399			22	49725	195	59389	0.846077
		23	29580	116	92281	0.503307			23	15810	62	41495	0.269009
		24	38250	150	59275	0.650829			24	40035	157	44904	0.681201
		25	36465	143	71797	0.620457			25	35955	141	67564	0.611779
		26	41055	161	71053	0.698556			26	29580	116	54899	0.503307
		27	34935	137	58726	0.594423			27	19380	76	46427	0.329753
		28	33405	131	45483	0.56839			28	20400	80	60128	0.347109
		29	37485	147	76756	0.637812			29	29325	115	45714	0.498969
		30	34425	135	94864	0.585746			30	51510	202	70690	0.876449
		31	40290	158	104830	0.685539			31	58140	228	75671	0.989259
		32	47430	186	126080	0.807027			32	16575	65	48912	0.282026
		33	51255	201	87106	0.87211			33	29325	115	73046	0.498969
		34	44115	173	97344	0.750622			34	24990	98	43765	0.425208
		35	37230	146	107986	0.633473			35	43605	171	56118	0.741945
		36	36210	142	94312	0.616118			36	25500	100	81912	0.433886
		37	19635	77	30308	0.334092			37	28815	113	97724	0.490291
		38	37995	149	88576	0.64649			38	34425	135	54705	0.585746
		39	16830	66	25231	0.286365			39	20655	81	50672	0.351447
		40	35190	138	80953	0.598762			40	22185	87	52809	0.377481
		41	31620	124	43045	0.538018			41	17595	69	41474	0.299381
		42	35955	141	90364	0.611779			42	19125	75	55581	0.325414
		43	26520	104	67038	0.451241			43	12495	49	47862	0.212604
		44	27540	108	99277	0.468597			44	52020	204	74150	0.885127
		45	31620	124	82299	0.538018			45	35190	138	41314	0.598762
		46	28305	111	46368	0.481613			1	19380	76	57060	0.329753
		47	40545	159	84541	0.689878			2	11730	46	47403	0.199587
		48	29325	115	76787	0.498969			3	45390	178	78512	0.772317
		49	28560	112	72929	0.485952			4	32130	126	58880	0.546696
		50	40800	160	94438	0.694217			5	15810	62	44679	0.269009
		51	41565	163	88274	0.707234			6	48705	191	92482	0.828722
		52	25500	100	58334	0.433886			7	56100	220	91690	0.954549
		53	35445	139	83675	0.603101			8	42840	168	62697	0.728928
		54	46920	184	76530	0.79835			9	12750	50	58463	0.216943
		55	34935	137	95673	0.594423			10	22695	89	50290	0.386158
		56	39780	156	60698	0.676862			11	34680	136	84771	0.590085
		57	30345	119	60553	0.516324			12	48195	189	75694	0.820044
		58	34425	135	91928	0.585746			13	15300	60	99775	0.260331
		1	49980	196	57180	0.850416			14	25500	100	109129	0.433886
		2	43095	169	69307	0.733267			15	28305	111	44727	0.481613
		3	27030	106	63787	0.459919			16	9180	36	82267	0.156199
		4	42585	167	62712	0.724589			17	29835	117	76822	0.507646
		5	34425	135	65001	0.585746			18	45900	180	94929	0.780994
		6	47940	188	72528	0.815705			19	44370	174	67388	0.754961
		7	34425	135	78481	0.585746			20	44880	176	82033	0.763639
		8	40800	160	71030	0.694217			21	15045	59	53412	0.255993
		9	33660	132	71147	0.572729			22	20655	81	48931	0.351447
		10	34935	137	99061	0.594423			23	47685	187	103456	0.811366
		11	39780	156	109844	0.676862			24	20910	82	63355	0.355786
		12	44880	176	112660	0.763639			25	13260	52	77612	0.225621
		13	40545	159	63785	0.689878			26	51255	201	82351	0.87211
		14	37740	148	50025	0.642151			27	26775	105	108133	0.45558
		15	22185	87	76717	0.377481			28	36210	142	53781	0.616118
		16	40290	158	97999	0.685539			29	18105	71	146088	0.308059
		17	36720	144	43454	0.624795			30	28050	110	108737	0.477274
		18	43095	169	110608	0.733267			31	56100	220	93807	0.954549
		19	36465	143	66823	0.620457			32	32895	129	91331	0.559713
		20	37995	149	70642	0.64649			33	39525	155	74236	0.672523
		21	39270	154	80296	0.668184			34	17340	68	51395	0.295042
		22	55590	218	78014	0.945871			35	33150	130	71778	0.564051
		23	28815	113	48676	0.490291			36	43350	170	92057	0.737606
		24	28305	111	83302	0.481613			37	22695	89	91405	0.386158
		25	34170	134	91381	0.581407			38	27795	109	46631	0.472935
		26	36975	145	69159	0.629134			39	36210	142	47646	0.616118
		27	28560	112	66187	0.485952			40	41565	163	91838	0.707234
		28	26775	105	52852	0.45558			41	23715	93	77442	0.403514
		29	34425	135	74206	0.585746			42	15555	61	40456	0.26467
		30	32130	126	71180	0.546696			1	22950	90	90712	0.390497
		31	75480	296	185413	1.2843			2	7395	29	32951	0.125827
		32	32640	128	49198	0.555374			3	46665	183	73341	0.794011
		33	26520	104	33936	0.451241			4	43605	171	57777	0.741945
		34	56100	220	128752	0.954549			5	33915	133	43406	0.577068
		35	48195	189	101831	0.820044			6	11730	46	52000	0.199587
		36	29325	115	49292	0.498969			7	42330	166	95604	0.72025
		37	42840	168	55967	0.728928			8	48960	192	74001	0.833061
		1	35955	141	80942	0.611779			9	22695	89	44218	0.386158
		2	40800	160	49274	0.694217			10	15045	59	47053	0.255993
		3	24225	95	45253	0.412191			11	14535	57	66583	0.247315
		4	39525	155	101272	0.672523			12	42330	166	52332	0.72025
		5	24225	95	72032	0.412191			13	25755	101	88119	0.438225
		6	24990	98	41390	0.425208			14	29325	115	31888	0.498969
		7	24225	95	72438	0.412191			15	20910	82	54395	0.355786
		8	39270	154	63560	0.668184			16	19635	77	72361	0.334092
		9	27795	109	43270	0.472935			17	13260	52	68001	0.225621
		10	22185	87	36739	0.377481			18	16830	66	49592	0.286365
		11	34170	134	51334	0.581407			19	52785	207	88759	0.898143
		12	34680	136	81094	0.590085			20	10455	41	53399	0.177893
		13	37740	148	92739	0.642151			21	32640	128	89740	0.555374
		14	31875	125	91140	0.542357			22	21675	85	84733	0.368803
		15	34680	136	94805	0.590085			23	52530	206	73477	0.893805
		16	34170	134	100231	0.581407			24	31365	123	45082	0.533679
		17	45645	179	65911	0.776655			25	33150	130	71000	0.564051
		18	29580	116	102558	0.503307			26	18105	71	61426	0.308059
		19	34680	136	98964	0.590085			27	12750	50	43084	0.216943
		20	25245	99	59515	0.429547			28	30855	121	89643	0.525002
		21	29580	116	54871	0.503307			29	41310	162	72745	0.702895
		22	24990	98	73347	0.425208			30	36720	144	71873	0.624795
		23	37995	149	100097	0.64649			31	47685	187	68280	0.811366
		24	26775	105	84413	0.45558			32	35445	139	58707	0.603101
		25	32895	129	113741	0.559713			33	44115	173	57850	0.750622
		26	31620	124	108437	0.538018			34	44370	174	76296	0.754961
		27	32385	127	64692	0.551035			35	44115	173	62065	0.750622
		28	27795	109	93391	0.472935			36	17850	70	57411	0.30372
		29	30090	118	50185	0.511985			37	33405	131	71917	0.56839
		30	36720	144	111266	0.624795			38	12750	50	63104	0.216943
		31	21930	86	32356	0.373142			39	31110	122	85190	0.529341
		32	29325	115	85251	0.498969			40	27030	106	102402	0.459919
		33	28050	110	102344	0.477274			41	15300	60	73405	0.260331
		34	43860	172	123433	0.746283			42	19125	75	75433	0.325414
		35	40290	158	76796	0.685539			43	10455	41	65117	0.177893
		36	35955	141	82678	0.611779			44	30855	121	50781	0.525002
		37	45645	179	99250	0.776655			45	15045	59	47691	0.255993
		38	47430	186	106193	0.807027			46	33405	131	69551	0.56839
		39	27540	108	94606	0.468597			47	16065	63	88368	0.273348
		40	51255	201	157073	0.87211			48	42075	165	78840	0.715911
		41	23715	93	49925	0.403514			49	11220	44	67151	0.19091
		42	38250	150	106940	0.650829			50	31620	124	72907	0.538018
		43	39015	153	115651	0.663845			51	17085	67	53805	0.290703
		44	21420	84	73294	0.364464			52	37230	146	64362	0.633473
		45	30855	121	88833	0.525002			53	17595	69	93408	0.299381
		46	34680	136	115523	0.590085			54	14025	55	71807	0.238637
		47	32130	126	111723	0.546696			55	36210	142	43722	0.616118
		48	29325	115	41861	0.498969			56	37230	146	76662	0.633473
		49	29325	115	63225	0.498969			57	14025	55	47008	0.238637
		50	28815	113	38045	0.490291			58	36720	144	63496	0.624795
		51	37995	149	117439	0.64649			59	29835	117	46096	0.507646
		52	37995	149	131413	0.64649			60	16575	65	109131	0.282026
		53	39270	154	114689	0.668184			61	28815	113	56138	0.490291
		54	25500	100	78902	0.433886			62	46665	183	69782	0.794011
		55	40035	157	125515	0.681201			63	43350	170	88972	0.737606
		56	33915	133	96842	0.577068			64	77010	302	166485	1.31033
		57	44880	176	125498	0.763639			65	45645	179	101286	0.776655
		58	38250	150	121282	0.650829			66	32385	127	55528	0.551035
		59	52020	204	67921	0.885127			67	29580	116	60383	0.503307
		60	43350	170	109728	0.737606			68	19380	76	38610	0.329753
		61	44880	176	90078	0.763639			69	18360	72	98833	0.312398
		62	32385	127	86436	0.551035			70	46920	184	53493	0.79835
		63	38760	152	55551	0.659506			71	24735	97	75542	0.420869
		64	35700	140	85301	0.60744			72	27795	109	42402	0.472935
		65	36975	145	57745	0.629134			73	35445	139	83800	0.603101
		66	31875	125	63756	0.542357			74	25755	101	52409	0.438225
									75	11475	45	44182	0.195249
									76	24735	97	81701	0.420869
									77	40290	158	44284	0.685539
									78	18615	73	74467	0.316737
									79	16320	64	51903	0.277687
									80	24735	97	39400	0.420869
									81	8670	34	42173	0.147521
									82	38505	151	73347	0.655167
									83	9690	38	41034	0.164877
									84	38760	152	67084	0.659506
									85	15045	59	47060	0.255993
									86	40800	160	82531	0.694217
									87	37740	148	85223	0.642151
									88	32640	128	53632	0.555374
									89	18105	71	76082	0.308059
									90	17340	68	47259	0.295042
									91	32130	126	86024	0.546696
									92	69360	272	104266	1.18017
									93	8415	33	72318	0.143182
									94	18105	71	80216	0.308059
									95	8160	32	33961	0.138843
