# Supplementary material for: Single cell, super-resolution imaging reveals an acid pH-dependent conformational switch in SsrB regulates SPI-2
Source: eLife. 2019 Apr 29;8:e45311. doi: 10.7554/eLife.45311 (PMC6557628; doi:10.7554/eLife.45311)
Supplement: Figure 6—source data 1. [file elife-45311-fig6-data1.xlsx]

## Sheet: Sheet1
	wild-type	ssrB	SsrB D56A	SsrB K179A	SsrB D56E
Exp 1	18392.3	1421.73	1582.7	1381.25	2059.68
Exp 2	24997.4	1922.66	2667.5	2493.94	1828.74
All tested at pH 5.6
	"Exp" refers to independent experiments
