# Supplementary material for: Single cell, super-resolution imaging reveals an acid pH-dependent conformational switch in SsrB regulates SPI-2
Source: eLife. 2019 Apr 29;8:e45311. doi: 10.7554/eLife.45311 (PMC6557628; doi:10.7554/eLife.45311)
Supplement: Figure 7—source data 1. [file elife-45311-fig7-data1.xlsx]

## Sheet: Sheet1
Figure 6B	A relative height distribution histogram of the sifA704 promoter complexed with 30 nM SsrB at pH 6.8 compared to pH 6.1.
Relative Height(nm)sifA704 pH6.8	sifA704 pH6.8	sifA704+SsrB-pH6.8	sifA704+SsrB-pH6.1
0	0.45569	0.554901	0.348713
0.5	0.531735	0.426925	0.43992
1	0.010497	0.0129038	0.0882577
1.5	0.000795503	0.00229283	0.0467783
2	0.000248342	0.00101721	0.0286898
2.5	0.000248342	0.000537317	0.0186009
3	0.000216038	0.000324031	0.0120194
3.5	0.000181714	0.000184574	0.00711377
4	0.00018979	0.000131253	0.00425107
4.5	0.000131238	0.000139456	0.00228751
5	5.04761e-05	0.000106643	0.00126937
5.5	1.61523e-05	9.84397e-05	0.000690882
6	0	4.92199e-05	0.000360316
6.5	0	6.15248e-05	0.000264452
7	0	3.69149e-05	0.000211562
7.5	0	6.97281e-05	0.000195034
8	0	5.33215e-05	0.000181811
8.5	0	4.92199e-05	6.61131e-05
9	0	5.74232e-05	8.26413e-05
9.5	0	5.33215e-05	3.30565e-05
10	0	0	0
