# Supplementary material for: Single cell, super-resolution imaging reveals an acid pH-dependent conformational switch in SsrB regulates SPI-2
Source: eLife. 2019 Apr 29;8:e45311. doi: 10.7554/eLife.45311 (PMC6557628; doi:10.7554/eLife.45311)
Supplement: Figure 8—figure supplement 1—source data 1. [file elife-45311-fig8-figsupp1-data1.xlsx]

## Sheet: ssrB-lacZ
	wild-type	phoP	PhoP-4-PAmCherry	PhoP-10-PAmCherry
Exp 1	47982.9	10417.9	26939.5	32436
Exp 2	37231.5	9079.84	24543.8	26927.3
All tested at pH 5.6
	"Exp" refers to independent experiments

## Sheet: Pompf-gfp
WT 14028s					14028s ompr::Kan attB::ompr-PAmcherry				14028s del ompr
(low osmo A medium), Pompf-gfp					(low osmo A medium), Pompf-gfp				(low osmo A medium), Pompf-gfp
	# of cells	Intensity			# of cells	Intensity			# of cells	Intensity
	82	646519	Mean		90	764771	Mean		84	60455.8	Mean
		399737	Std			548586	Std			18749.8	Std
	1	112914			1	380727			1	57456
	2	405352			2	999226			2	60071
	3	489171			3	624612			3	29864
	4	249690			4	459754			4	70032
	5	98437			5	447358			5	55620
	6	1118744			6	816292			6	60407
	7	361837			7	403448			7	82578
	8	1197575			8	704551			8	70192
	9	558710			9	949213			9	58377
	10	918281			10	652320			10	57926
	11	568783			11	973289			11	53638
	12	1334233			12	436632			12	71618
	13	768443			13	939253			13	74369
	14	2301884			14	552017			14	330
	15	668662			15	2152896			15	114997
	16	845231			16	1451200			16	87259
	17	469751			17	978708			17	89232
	18	476073			18	348672			18	57686
	19	608863			19	362903			19	56199
	20	732112			20	664020			20	67626
	21	1049002			21	349617			21	68947
	22	1135876			22	365016			22	35696
	23	591203			23	2735602			23	41207
	24	744124			24	447932			24	59133
	25	382392			25	481749			25	60394
	26	291587			26	1767480			26	37903
	27	353836			27	671349			27	42251
	28	616444			28	282402			28	58028
	29	160661			29	447202			29	51062
	30	640676			30	234560			30	86112
	31	683996			31	321496			31	29104
	32	1323502			32	745652			32	68349
	33	211937			33	1124802			33	45541
	34	1004367			34	1133960			34	76308
	35	544001			35	2445619			35	33129
	36	596558			36	2732385			36	67895
	37	1159410			37	1103756			37	48374
	38	673808			38	380417			38	55774
	39	819253			39	247845			39	44222
	40	689372			40	239398			40	54540
	41	1029920			41	424273			41	65460
	42	333825			42	625192			42	90485
	43	1019097			43	1770930			43	51282
	44	399931			44	344111			44	48958
	45	478521			45	829834			45	68999
	46	1958138			46	431085			46	72060
	47	1172696			47	395995			47	74896
	48	356988			48	825151			48	79293
	49	1068285			49	1857892			49	50765
	50	477755			50	454310			50	62759
	51	362218			51	685306			51	65520
	52	971086			52	556636			52	81185
	53	396769			53	392732			53	42658
	54	118665			54	439146			54	72313
	55	1142936			55	670796			55	81575
	56	313360			56	458721			56	56186
	57	579490			57	889700			57	36185
	58	100818			58	492391			58	62111
	59	241005			59	414500			59	39307
	60	618014			60	297023			60	52252
	61	531374			61	978422			61	70329
	62	821981			62	659693			62	68791
	63	873359			63	807099			63	54575
	64	530121			64	553041			64	75198
	65	490953			65	297973			65	50191
	66	634355			66	400161			66	127992
	67	436231			67	443690			67	58691
	68	370236			68	399075			68	57044
	69	660069			69	554434			69	73053
	70	218746			70	521036			70	44469
	71	164591			71	301919			71	54062
	72	1159164			72	460559			72	82617
	73	379031			73	419533			73	47327
	74	722214			74	489426			74	53857
	75	493784			75	1054567			75	96508
	76	1071003			76	534029			76	42563
	77	207893			77	1280707			77	74164
	78	419774			78	2079943			78	48137
	79	1031111			79	945944			79	46412
	80	243667			80	1437525			80	41679
	81	226405			81	885933			81	43798
	82	232198			82	1102745			82	54241
					83	1578541			83	47748
					84	414882			84	71143
					85	229545
					86	848774
					87	1207512
					88	318536
					89	463081
					90	350050

## Sheet: Pompc-gfp
WT 14028s				14028s ompr::Kan attB::ompr-PAmcherry					14028s del ompr
high osmo A medium), Pompc-gfp				high osmo A medium), Pompc-gfp					high osmo A medium), Pompc-gfp
	# cells	Intensity			# cells	Intensity			# cells	Intensity
	103	486350	Mean		124	263562	Mean		79	57836.3	Mean
		216944	Std			127099	Std			16325.5	Std
	1	446139			1	380784			1	68714
	2	256599			2	105454			2	81538
	3	367631			3	170828			3	83057
	4	283188			4	513104			4	73248
	5	268955			5	146585			5	72872
	6	340325			6	234359			6	70472
	7	851071			7	360640			7	48097
	8	672468			8	512617			8	116995
	9	456985			9	741113			9	64345
	10	290607			10	289265			10	65557
	11	742609			11	212235			11	27547
	12	727587			12	270743			12	63211
	13	493968			13	550188			13	69288
	14	432571			14	423588			14	35761
	15	360810			15	125950			15	48538
	16	454781			16	226503			16	47825
	17	566491			17	179238			17	60078
	18	303683			18	239259			18	78663
	19	368543			19	327730			19	47761
	20	670790			20	119880			20	79184
	21	488592			21	228766			21	91815
	22	363939			22	213433			22	69778
	23	261396			23	566895			23	66339
	24	261319			24	424356			24	38614
	25	218702			25	275227			25	37960
	26	710388			26	432814			26	56790
	27	210865			27	436802			27	68687
	28	1162889			28	472075			28	47918
	29	776744			29	168639			29	64777
	30	633473			30	488353			30	74412
	31	722122			31	222160			31	66765
	32	745650			32	294413			32	39871
	33	730926			33	201382			33	55961
	34	1093408			34	246280			34	80932
	35	468719			35	317662			35	64412
	36	1263621			36	526784			36	70738
	37	446922			37	211776			37	56604
	38	518439			38	299551			38	47786
	39	488701			39	295632			39	47341
	40	432659			40	181878			40	50890
	41	388666			41	408175			41	83055
	42	687696			42	108821			42	43931
	43	934131			43	154774			43	58665
	44	328901			44	388087			44	42440
	45	668175			45	195407			45	56869
	46	357102			46	349443			46	50546
	47	522982			47	141571			47	46328
	48	216482			48	180943			48	62764
	49	551039			49	111531			49	94680
	50	583477			50	267775			50	50372
	51	195425			51	88627			51	46847
	52	311911			52	129118			52	62734
	53	332602			53	191578			53	66380
	54	452421			54	228275			54	33872
	55	173388			55	208199			55	52655
	56	387886			56	144361			56	68257
	57	307133			57	118868			57	34161
	58	494564			58	116284			58	53408
	59	296620			59	111093			59	33031
	60	561807			60	191030			60	48985
	61	332145			61	116353			61	61880
	62	311436			62	108823			62	38148
	63	472813			63	186849			63	42278
	64	457288			64	302175			64	58122
	65	514895			65	107011			65	61192
	66	387403			66	260046			66	69219
	67	457994			67	80759			67	74440
	68	273012			68	134433			68	74000
	69	480638			69	186129			69	52730
	70	551248			70	501496			70	54409
	71	389334			71	334154			71	48868
	72	238097			72	298428			72	47927
	73	198998			73	131396			73	49959
	74	503773			74	358510			74	33323
	75	437817			75	160200			75	56023
	76	511579			76	274104			76	41695
	77	617759			77	136682			77	42146
	78	451409			78	390646			78	38029
	79	647283			79	157088			79	33555
	80	820094			80	191586
	81	724741			81	289395
	82	358965			82	137031
	83	364968			83	265263
	84	421992			84	417425
	85	642288			85	196441
	86	483581			86	148046
	87	666480			87	312170
	88	552069			88	555786
	89	803461			89	214994
	90	328394			90	375562
	91	582339			91	200021
	92	405057			92	166528
	93	412212			93	258230
	94	1129333			94	377145
	95	199846			95	271547
	96	498954			96	305304
	97	172921			97	217642
	98	496240			98	224481
	99	365174			99	412463
	100	323092			100	249474
	101	341211			101	408859
	102	436676			102	166196
	103	221389			103	193044
					104	225913
					105	192041
					106	339307
					107	279384
					108	399549
					109	225050
					110	147334
					111	359533
					112	295991
					113	221646
					114	117971
					115	545097
					116	104917
					117	249070
					118	109665
					119	140316
					120	268180
					121	262053
					122	371961
					123	292514
					124	285324
