# Supplementary material for: Single cell, super-resolution imaging reveals an acid pH-dependent conformational switch in SsrB regulates SPI-2
Source: eLife. 2019 Apr 29;8:e45311. doi: 10.7554/eLife.45311 (PMC6557628; doi:10.7554/eLife.45311)
Supplement: Figure 8—figure supplement 1—source data 2. [file elife-45311-fig8-figsupp1-data2.xlsx]

## Sheet: Sheet1
	wild-type	phoP	PhoP-4-PAmCherry	PhoP-10-PAmCherry
Exp 1	47982.9	10417.9	26939.5	32436
Exp 2	37231.5	9079.84	24543.8	26927.3
All tested at pH 5.6
	"Exp" refers to independent experiments
