# Supplementary material for: Single cell, super-resolution imaging reveals an acid pH-dependent conformational switch in SsrB regulates SPI-2
Source: eLife. 2019 Apr 29;8:e45311. doi: 10.7554/eLife.45311 (PMC6557628; doi:10.7554/eLife.45311)
Supplement: Figure 8—source data 1. [file elife-45311-fig8-data1.xlsx]

## Sheet: Sheet1
			Binding probabilities for various SsrB concentrations
		SsrB: pH = 6.1
		conc (nM)	Prob1	Prob2	Prob3	Prob4	Prob5	Average	Std. Error
		0	0	0	0	0	0	0	0
		25	0.1	0	0.54			0.21	0.17
		37	0.64	0.07	0.9	0.07		0.42	0.21
		50	0.21	0.75	0.42			0.46	0.16
		75	1	0.9	0.87	0.93		0.93	0.03
		100	1	1	1	1	1	1	0
		250	1	1	1			1	0
		SsrB: pH = 7.4
		conc (nM)	Prob1	Prob2	Prob3	Prob4	Prob5	Average	Std. Error
		0	0	0	0	0	0	0	0
		125	0.17	0	0.2	0.03		0.1	0.05
		250	0.73	0.6	0.57			0.63	0.05
		500	0.8	0.83	0.7			0.78	0.04
		750	0.9	0.82	0.82			0.85	0.03
		1000	1	1	1	1		1	0
