# Supplementary material for: Single cell, super-resolution imaging reveals an acid pH-dependent conformational switch in SsrB regulates SPI-2
Source: eLife journal article supplement (doi:10.7554/elife.45311), 2019-04-29
Supplement: supp [file elife_poa_e45311_Figure_3_figure_supplement_1.docx]

**
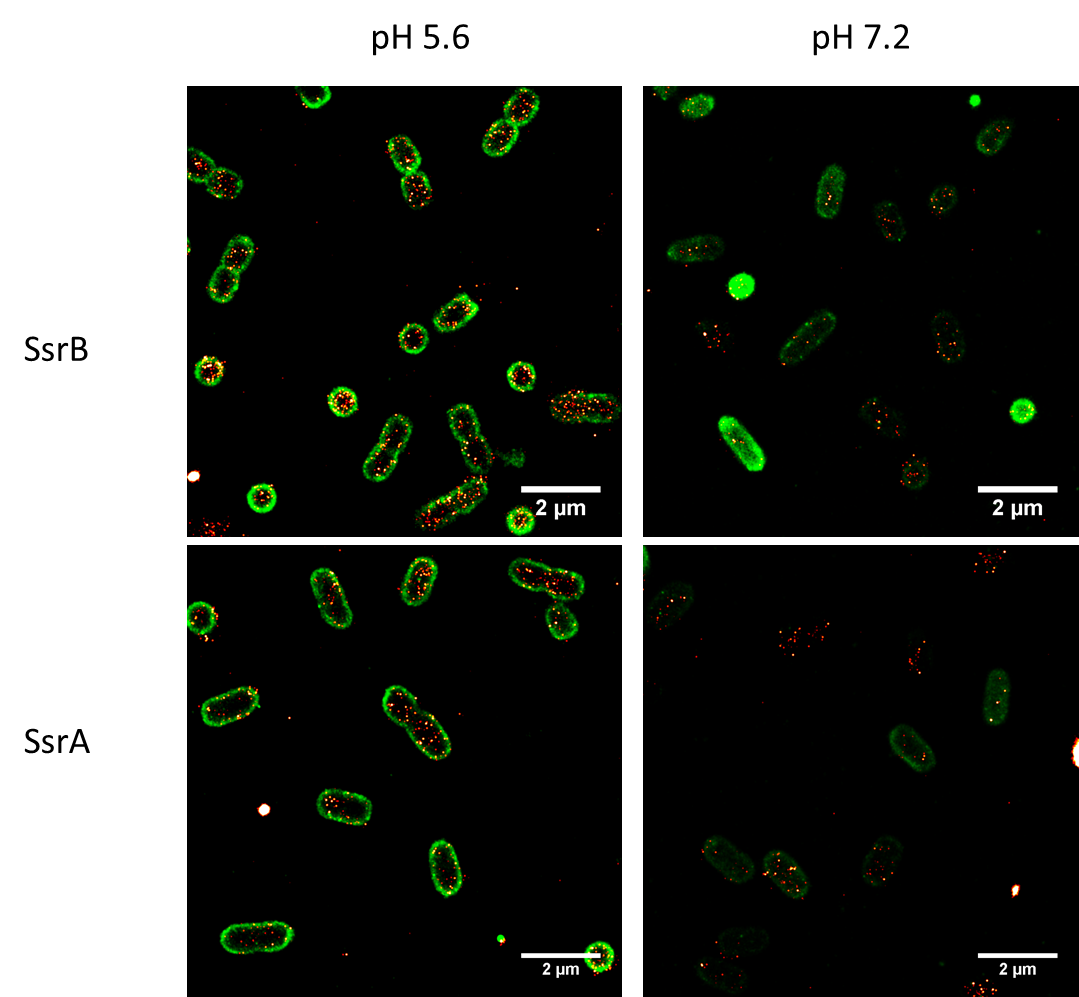
**

**Figure 3-figure supplement 1.** Two color, PALM-PAINT imaging of PAmCherry-SsrB (top panel) and SsrA–PAmCherry fusions (bottom panels) in red and cell membranes labeled with Nile red (green) grown in acid-inducing (left panels) or neutral pH conditions (right panels). Nile red staining is more heterogeneous at neutral pH. Scale bar = 2 m.
