# Supplementary material for: Single cell, super-resolution imaging reveals an acid pH-dependent conformational switch in SsrB regulates SPI-2
Source: eLife journal article supplement (doi:10.7554/elife.45311), 2019-04-29
Supplement: supp [file elife_poa_e45311_Figure_4_figure_supplement_4.docx]

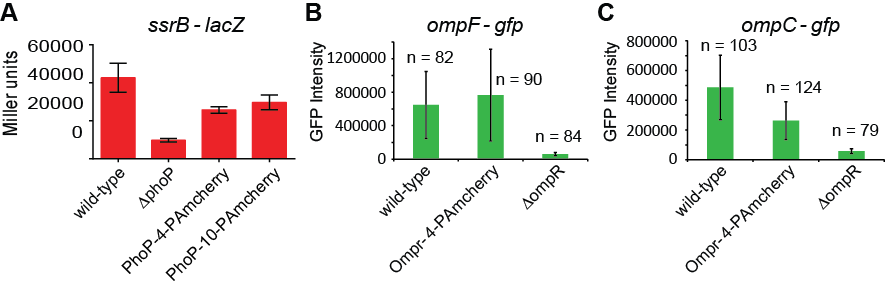


**Figure 4-figure supplement 4.** (**A**) Wild type, Δ*phoP*, PhoP-PAmCherry and PhoP-PAmCherry strains containing P*ssrB*-*lacZ* were grown in acid MgM media and assayed for β-galactosidase activity. The mean and standard deviations from two independent experiments was plotted, n = 3. (**B**) Wild type, Δ*ompR* and OmpR-PAmCherry strains containing (P*ompF*-*gfp*) were grown in low osmolality A media and imaged under a wide-field microscope for GFP intensity. (**C**) Wild type, Δ*ompR* and OmpR-PAmCherry strains containing (P*ompC*-*gfp*) were grown at high osmolality in A media supplemented with 15% sucrose and imaged under a wide-field microscope for GFP intensity in each cell. The mean and standard deviations were obtained from individual bacterial cells and the n is listed above the column.
