# Supplementary material for: Single cell, super-resolution imaging reveals an acid pH-dependent conformational switch in SsrB regulates SPI-2
Source: eLife journal article supplement (doi:10.7554/elife.45311), 2019-04-29
Supplement: supp [file elife_poa_e45311_Figure_6_figure_supplement_1.docx]

**
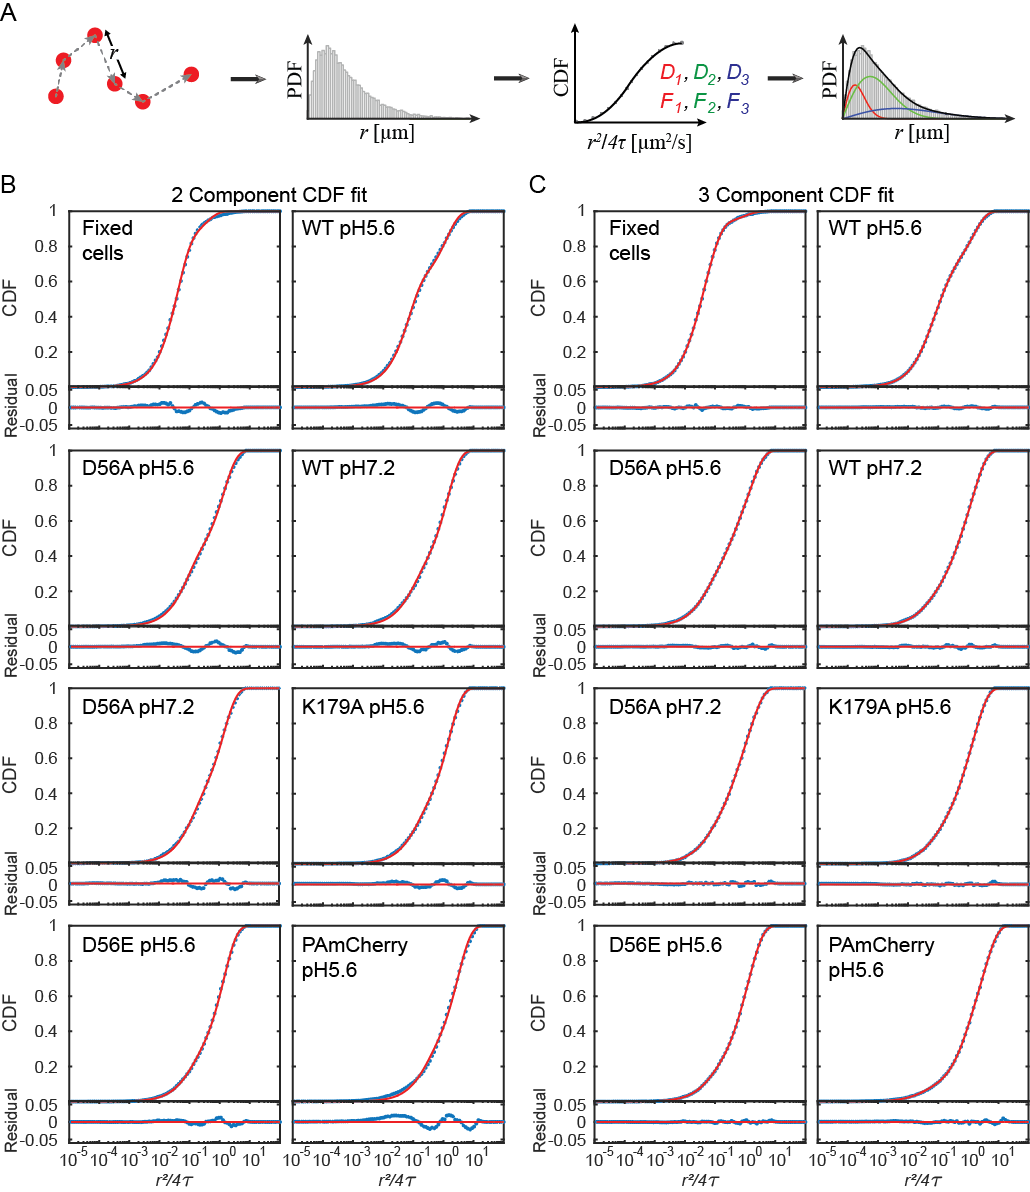
**

**Figure 6-figure supplement 1.** (**A**) Work flow of Spt-PALM. The distance moved by a molecule in subsequent camera frames, termed displacement *r*, can be plotted as a probability distribution function (PDF), which contains *r* from all the tracks obtained. Obtaining the apparent diffusion coefficient *D* from a fit of the PDF depends on the binning. Thus, the PDF is converted into a cumulative distribution function (CDF) and fitted with Equation 3 (see Methods). The values obtained from the fit are then plotted back into the PDF for presentation. (**B**) Data fitted with a two-component diffusion model equation vs (**C**) data fitted with three-component diffusion model (Equation 3). From the residues of the fits, a three-component diffusion model best fit our data and was used throughout.
