# Supplementary material for: Single cell, super-resolution imaging reveals an acid pH-dependent conformational switch in SsrB regulates SPI-2
Source: eLife journal article supplement (doi:10.7554/elife.45311), 2019-04-29
Supplement: supp [file elife_poa_e45311_Figure_6_figure_supplement_2.docx]

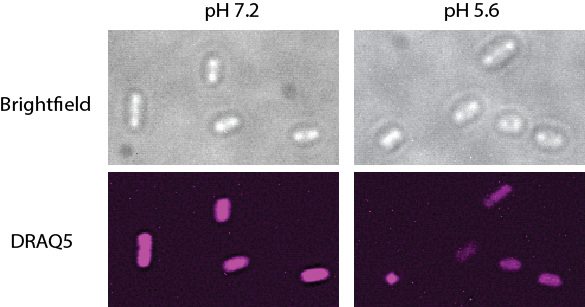


**Figure 6-figure supplement 2.**  Structured illumination microscopy (SIM) images of *Salmonella* grown in pH 7.2 and 5.6. The nucleoids were stained with DRAQ5. The nucleoid area of cells grown at pH 7.2 was 0.62 ± 0.15 µm2, n = 161. At pH 5.6, the nucleoid area was 0.50 ± 0.22 µm2, n = 182 (a ratio of 0.81). The intensity of the DRAQ5 signal in cells grown at pH 7.2 was 80553 ± 25446, while at pH 5.6 it was 66410 ± 20727 (ratio of 0.82).
