# Supplementary material for: Single cell, super-resolution imaging reveals an acid pH-dependent conformational switch in SsrB regulates SPI-2
Source: eLife journal article supplement (doi:10.7554/elife.45311), 2019-04-29
Supplement: supp [file elife_poa_e45311_Figure_8_figure_supplement_2.docx]

**Figure 8-figure supplement 2.** SsrB is a monomer at both acid and neutral pH. Purified SsrB was resuspended in acid buffer (20 mM MES pH 6.1, 50 mM KCl, 2 mM MgCl2, 2 mM DTT, 5% glycerol) or neutral buffer (20 mM Hepes pH 7.4, 50 mM KCl, 2 mM MgCl2, 2 mM DTT, 5% glycerol) and then separated on a gel filtration column using an AKTA FPLC system. The nearly identical elution profiles of SsrB indicate that SsrB is a monomer at both acid and neutral pH.
